# Supplementary material for: An “on–off–on” fluorescent peptide probe for the specific detection of Cu2+ and S2− in living cells and zebrafish
Source: Royal Society of Chemistry journal article supplement (doi:10.1039/d2nj00408a), 2022-01-01
Supplement: d2nj00408a1.pdf [file d2nj00408a1.pdf]

## Supporting information

### An “On-Off-On” fluorescent peptide probe for the specific detection of $\text{Cu}^{2+}$ and $\text{S}^{2-}$ in living cells and zebrafish

Yue Hu, Siqi Quan, Chuang Zhao, Jianan Li, Xiuxia Sun and Jianxi Xiao

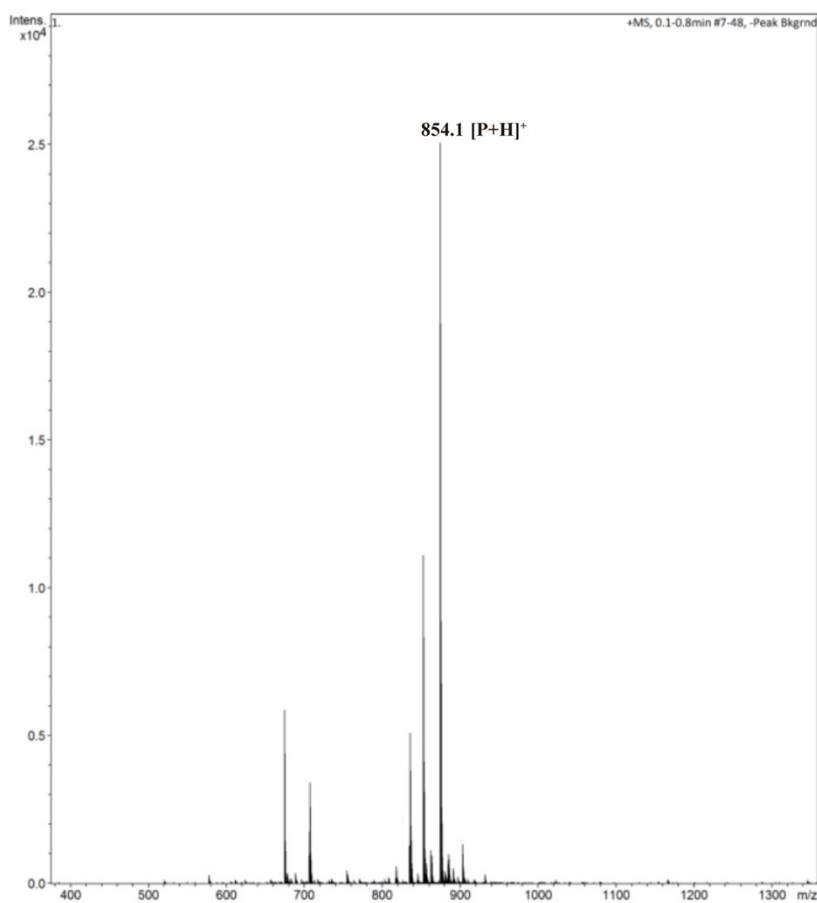

**Figure S1.** MS spectrum of fluorescent peptide probe P.

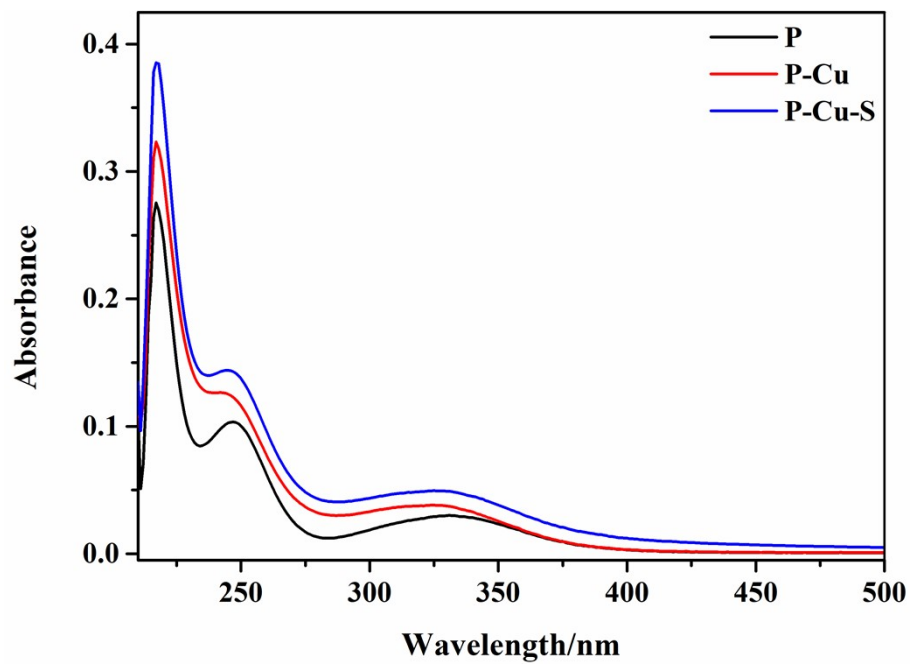

**Figure S2.** UV-vis spectrum of P (10  $\mu$ M), P-Cu (10  $\mu$ M), and P-Cu-S (10  $\mu$ M) in 10 mM HEPES buffer solution at pH 7.4.

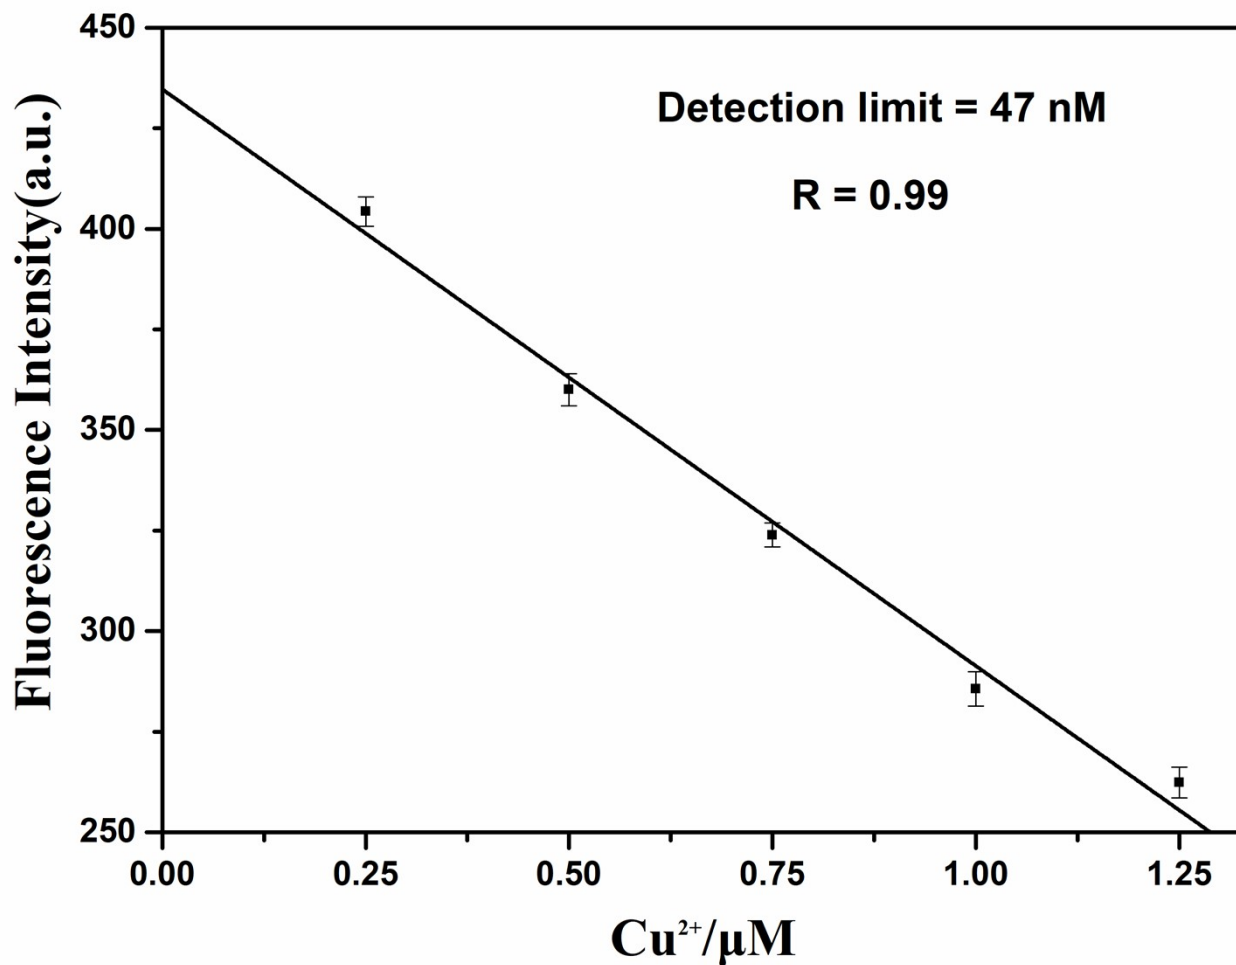

**Figure S3.** The changes of the fluorescence intensity monitored at the maximum fluorescence emission wavelength as a function of the concentration of Cu<sup>2+</sup>. The detection limits of Cu<sup>2+</sup> is 47 nM.

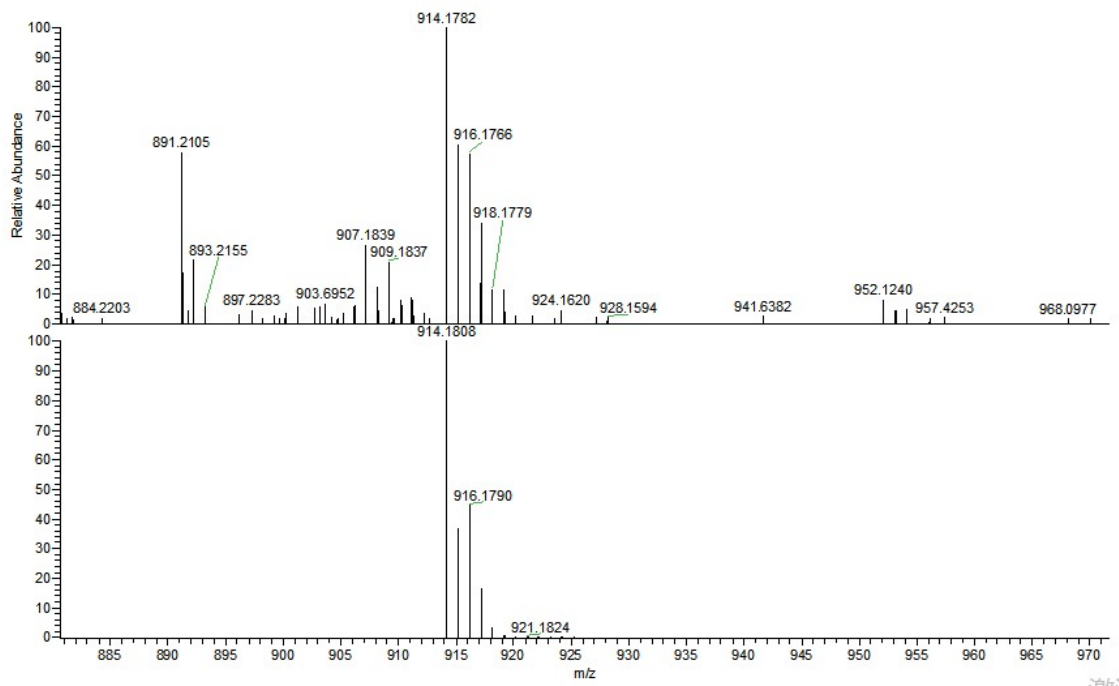

**Figure S4.** MS spectrum of [P+Cu<sup>2+</sup>-2H<sup>+</sup>].

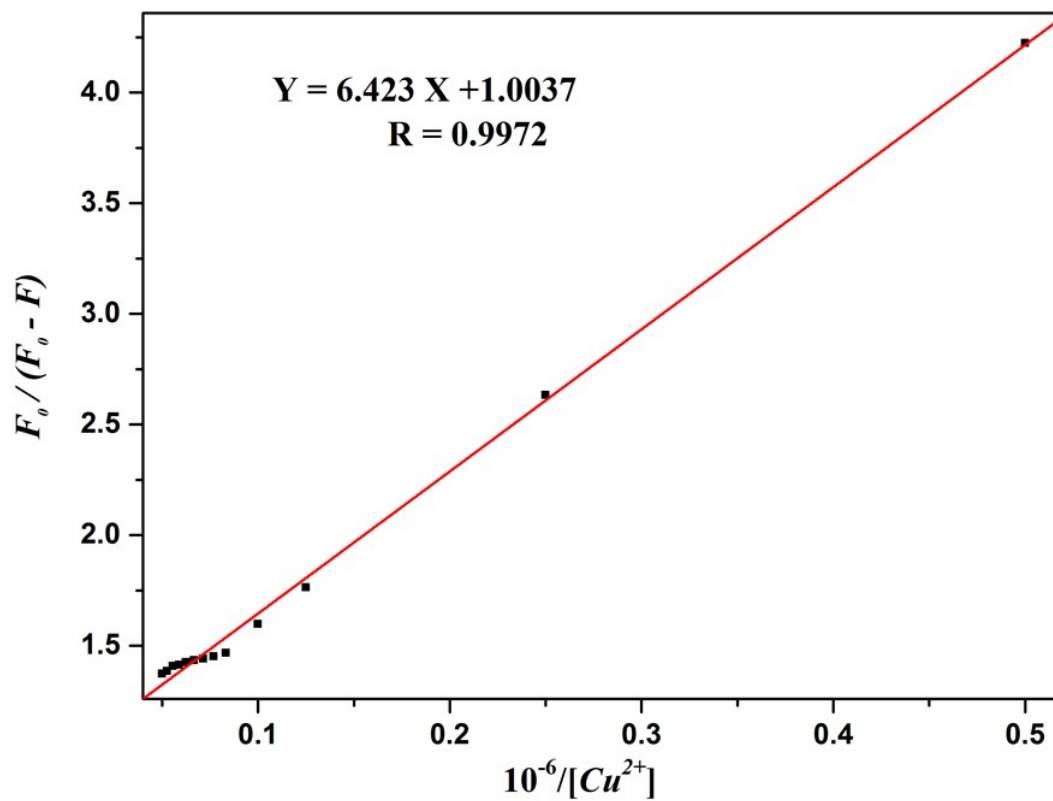

**Figure S5.** Fitting of fluorescence titration curve of P with  $Cu^{2+}$  in 10 mM HEPES buffer at pH 7.4. The binding constant is  $K_s = 1.56 \times 10^5 M^{-1}$ .

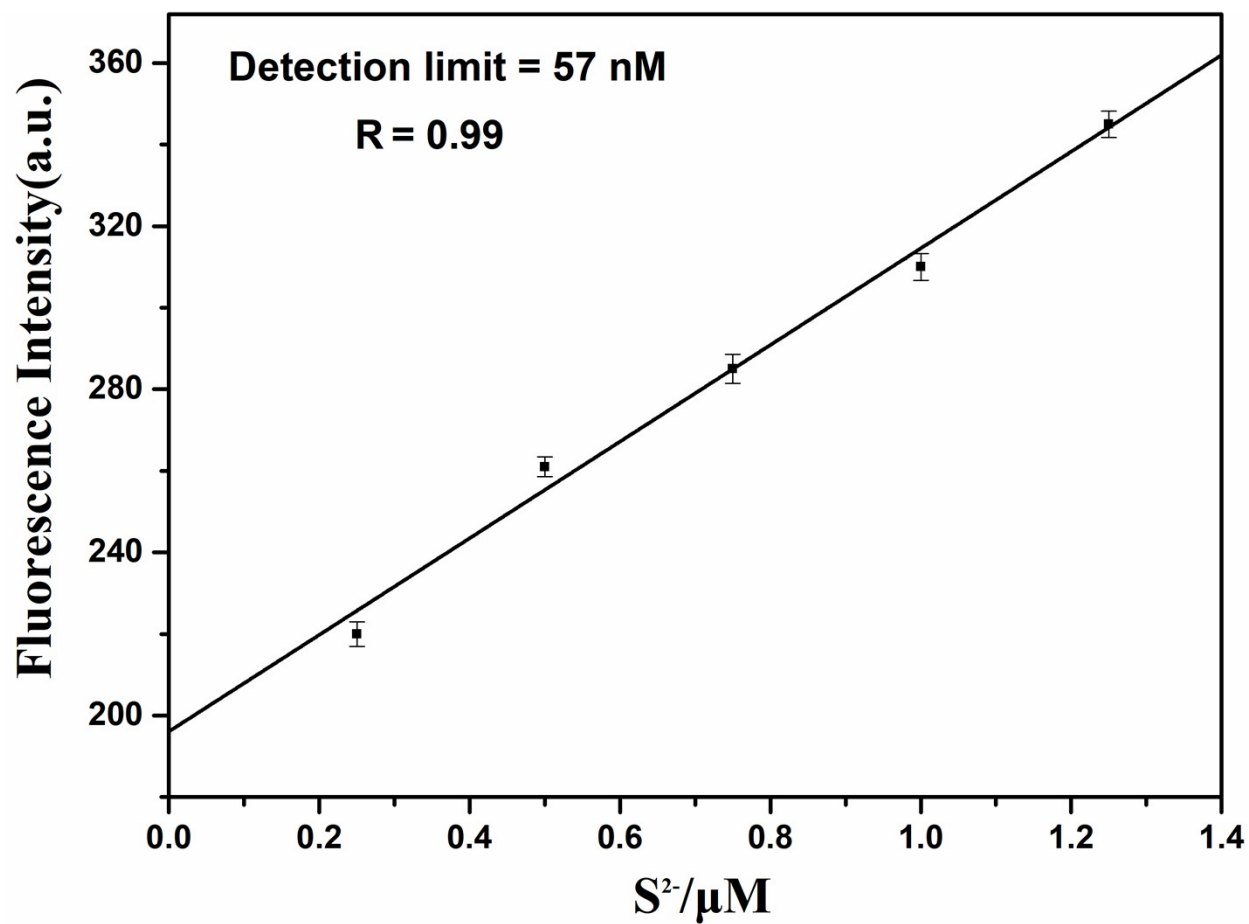

**Figure S6.** The changes of the fluorescence intensity monitored at the maximum fluorescence emission wavelength as a function of the concentration of  $S^{2-}$ . The detection limits of  $S^{2-}$  is 57 nM.

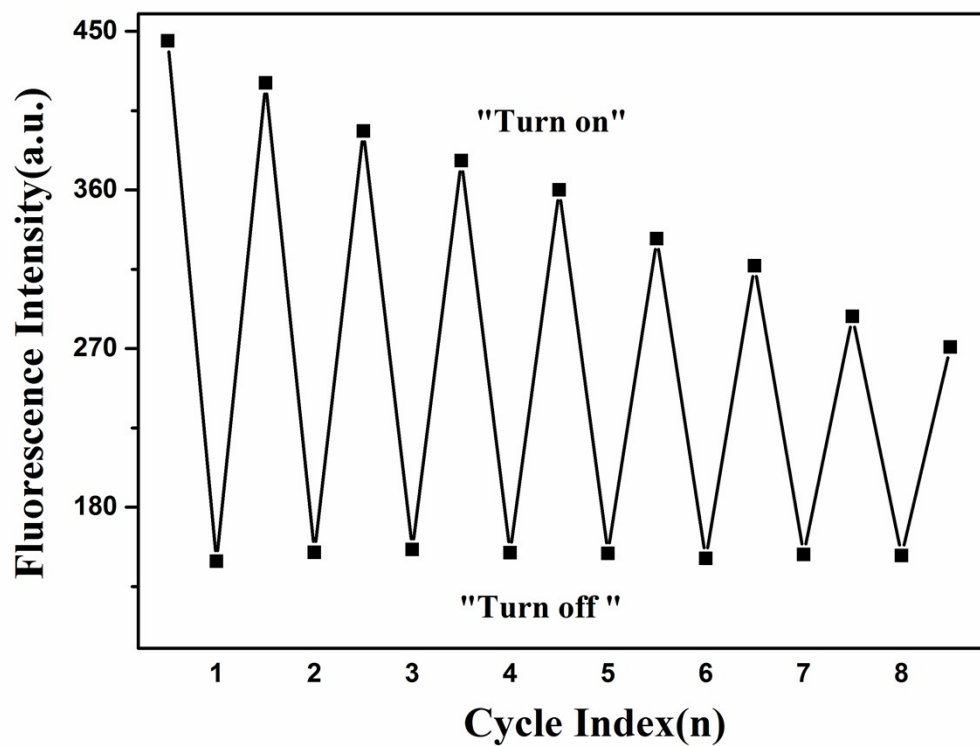

**Figure S7.** The cycle effect experiment with  $\text{Cu}^{2+}$  to  $\text{S}^{2-}$  in 10 mM HEPES buffer at pH 7.4.

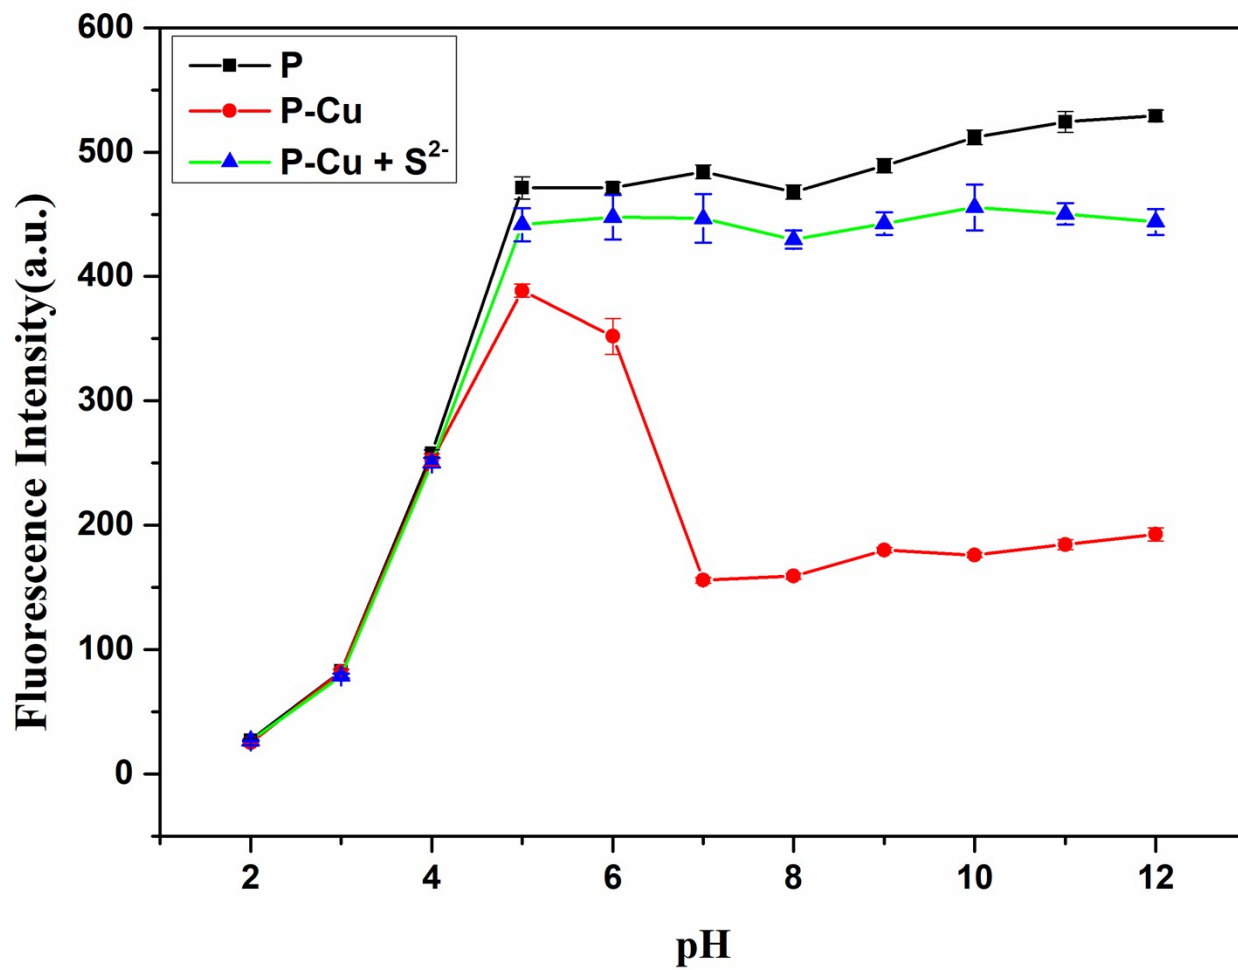

**Figure S8.** The pH influence on the fluorescence intensity of P in the absence (black line) and presence of Cu<sup>2+</sup> (red line) and S<sup>2-</sup> (blue line).



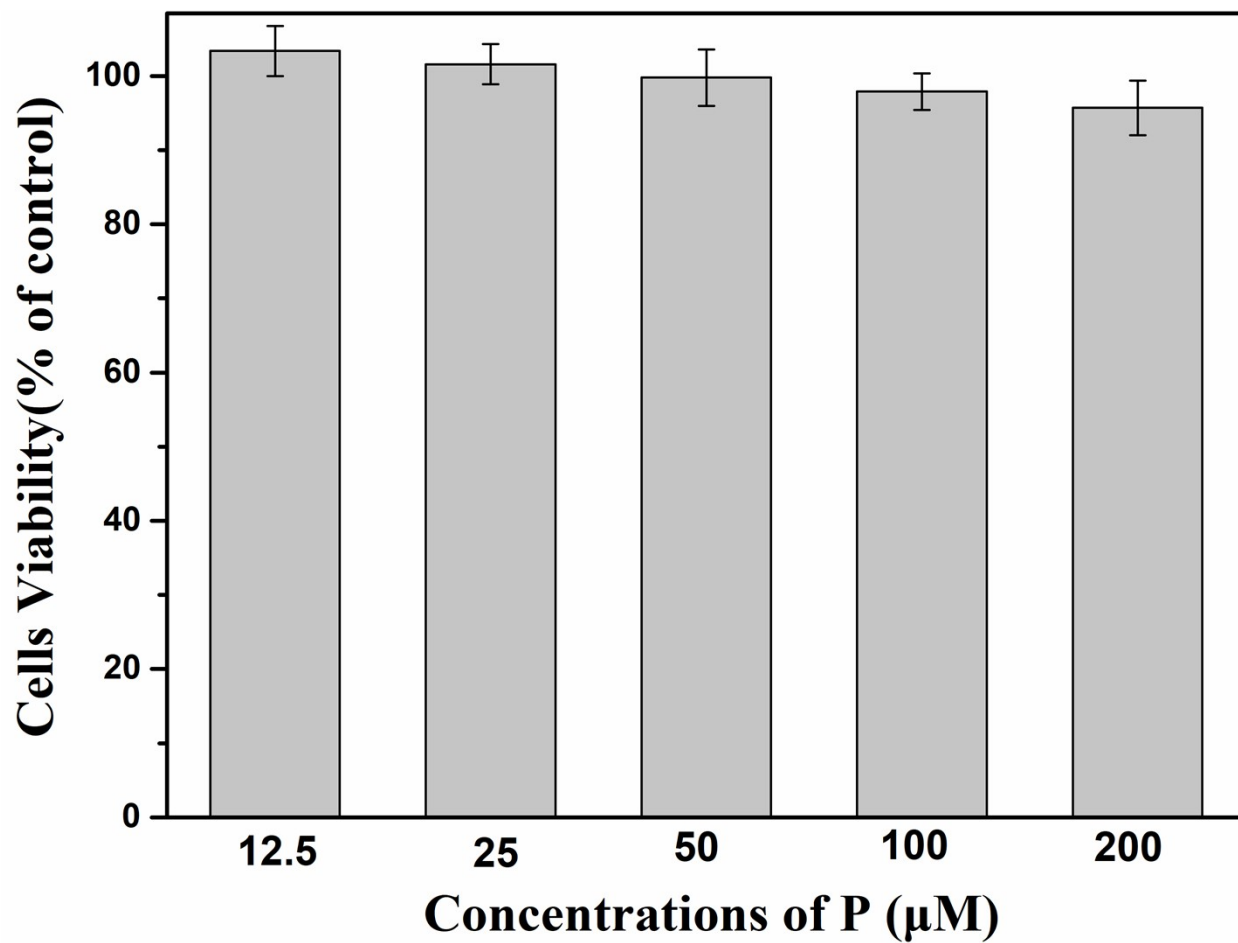

**Figure S9.** The CCK-8 assay of the fluorescent peptide probe P.
